# Supplementary material
Source: PubMed Central journal article supplement (PMC3053014)
Supplement: NIHMS246976-supplement-01.pdf [file NIHMS246976-supplement-01.pdf]

**Supplementary Material**

**Development, Specification, and Diversity of Callosal Projection Neurons**

**Ryann M. Fame<sup>\*1</sup>, Jessica L. MacDonald<sup>\*1</sup>, and Jeffrey D. Macklis<sup>1,2</sup>**

\* These two authors contributed equally to this work.

<sup>1</sup> MGH-HMS Center for Nervous System Repair, Departments of Neurosurgery and Neurology, and Program in Neuroscience, Harvard Medical School; Nayef Al-Rodhan Laboratories, Massachusetts General Hospital; and Department of Stem Cell and Regenerative Biology and Harvard Stem Cell Institute, Harvard University.

<sup>2</sup>*Corresponding author.* Jeffrey D. Macklis (Jeffrey\_macklis@hms.harvard.edu)

**Table S1. Genes expressed in callosal projection neurons (CPN) and their progenitors**

|                  | Gene          | Expression                              | Developmental Stage                            | Published Function in CPN/progenitors                                                      | Refs       |
|------------------|---------------|-----------------------------------------|------------------------------------------------|--------------------------------------------------------------------------------------------|------------|
| CPN Progenitors  | <i>Ap2g</i>   | VZ progenitors                          | embryonic                                      | regulates basal progenitor fate, and formation of layer II/III CPN in the occipital cortex | [S1]       |
|                  | <i>Brn1</i>   | SVZ IPCs and migrating neuroblasts      | embryonic                                      | together with <i>Brn2</i> , regulates generation and migration of layers II-IV             | [S2, S3]   |
|                  | <i>Brn2</i>   | SVZ IPCs and migrating neuroblasts      | embryonic                                      | together with <i>Brn1</i> , regulates generation and migration of layers II-IV             | [S2, S3]   |
|                  | <i>Cux1</i>   | mitotic SVZ IPCs                        | embryonic                                      | unknown                                                                                    | [S4]       |
|                  | <i>Cux2</i>   | mitotic SVZ IPCs                        | embryonic                                      | regulates SVZ progenitor proliferation and generation of superficial layers                | [S4-S6]    |
|                  | <i>Lhx2</i>   | VZ and SVZ progenitors                  | embryonic                                      | regulates cortical hem formation                                                           | [S7, S8]   |
|                  | <i>Svet1</i>  | SVZ IPCs                                | embryonic                                      | unknown                                                                                    | [S9]       |
|                  | <i>Tbr2</i>   | SVZ IPCs                                | embryonic                                      | regulates IPC specification, and expansion of all cortical layers.                         | [S10-S12]  |
|                  | <i>Tlx</i>    | VZ and SVZ progenitors                  | embryonic                                      | regulates generation of layers II/III and size of corpus callosum                          | [S13, S14] |
|                  | <i>Unc5d</i>  | SVZ IPCs                                | embryonic                                      | unknown                                                                                    | [S15]      |
| Post-mitotic CPN | <i>Brn1</i>   | layers II/III and IV                    | maintained through early postnatal development | unknown                                                                                    | [S2, S3]   |
|                  | <i>Brn2</i>   | layers II/III and IV                    | maintained through early postnatal development | unknown                                                                                    | [S2, S3]   |
|                  | <i>Btg1</i>   | CPN in layers II/III                    | high at E18, decreasing postnatally            | unknown                                                                                    | [S16]      |
|                  | <i>Cav1</i>   | CPN in deep sublamina of II/III, and Va | high at P3, and decreased by P14               | unknown                                                                                    | [S16]      |
|                  | <i>Chn2</i>   | CPN in deep sublamina of II/III         | high at P6, with expression maintained at P14  | unknown                                                                                    | [S16]      |
|                  | <i>Cited2</i> | CPN in layers II/III, V,                | high at E18, decreasing                        | unknown                                                                                    | [S16]      |

|               |                                                             |                                                                        |                                                                          |               |
|---------------|-------------------------------------------------------------|------------------------------------------------------------------------|--------------------------------------------------------------------------|---------------|
|               | and VI                                                      | postnatally                                                            |                                                                          |               |
| <i>Cux1</i>   | layers II/III and IV                                        | from embryonic development through adulthood                           | regulates dendritic branching, and synapse formation of layer II/III CPN | [S4, S17]     |
| <i>Cux2</i>   | layers II/III and IV                                        | from embryonic development through adulthood                           | regulates dendritic branching, and synapse formation of layer II/III CPN | [S4, S6, S17] |
| <i>Dkk3</i>   | CPN in layer VI                                             | increasing expression postnatally                                      | unknown                                                                  | [S16]         |
| <i>Dtx4</i>   | cortical plate and superficial sublamina of II/II, layer IV | early post-mitotic until early postnatal (decreased by P14)            | unknown                                                                  | [S15]         |
| <i>EphA3</i>  | CPN in superficial sublamina of II/III                      | high at E18, decreasing postnatally                                    | unknown                                                                  | [S16]         |
| <i>Frm4b</i>  | CPN in superficial sublamina of II/III                      | high at E18, decreasing postnatally                                    | unknown                                                                  | [S16]         |
| <i>Gfra2</i>  | CPN in Layers V and VI                                      | increasing expression postnatally                                      | unknown                                                                  | [S16]         |
| <i>Gpr6</i>   | layers II/III, highest occipital                            | expressed from P3-P15, with highest expression at P6.                  | unknown                                                                  | [S18]         |
| <i>Hspb3</i>  | CPN in layers II/III, V, and VI                             | high at P3, with expression maintained at P14                          | unknown                                                                  | [S16]         |
| <i>Inhba</i>  | CPN in layers II/III                                        | high at P3, and decreased by P14                                       | unknown                                                                  | [S16]         |
| <i>Kitl</i>   | layers II/III, IV, and early VI                             | early post-mitotic until early postnatal (decreased by P14)            | unknown                                                                  | [S15]         |
| <i>Limch1</i> | CPN in layers II/III                                        | high at E18, decreasing postnatally                                    | unknown                                                                  | [S16]         |
| <i>Lhx2</i>   | layers II-IV                                                | high embryonic and early postnatal expression, decreasing by adulthood | necessary to specify neocortex                                           | [S8, S12]     |
| <i>Lmo4</i>   | CPN in layers II/III and V                                  | Increases in CPN throughout postnatal                                  | regulates area identities and connectivity of somatosensory cortex       | [S19-S22]     |

|                 |                                                                              |                                                                                    |                                                                                                    |  |            |
|-----------------|------------------------------------------------------------------------------|------------------------------------------------------------------------------------|----------------------------------------------------------------------------------------------------|--|------------|
|                 |                                                                              |                                                                                    | development, with highest expression medially                                                      |  |            |
| <i>Lpl</i>      | CPN in layers II/III, V, and VI                                              | high at P3, and decreased by P14                                                   | unknown                                                                                            |  | [S16]      |
| <i>Mdga1</i>    | preplate, IZ, and cortical plate. Layers II/III, and layers IV and VIa in S1 | high preplate expression at E13.5 and high cortical expression by P7               | controls correct migration of layer II/III neurons                                                 |  | [S23, S24] |
| <i>Mef2c</i>    | cortical plate and layers II/III, IV                                         | early post-mitotic until early postnatal (decreased by P14)                        | critical for differentiation of neocortical neurons                                                |  | [S15, S25] |
| <i>Mena</i>     | layers II/III, and V                                                         | from embryonic development through adulthood                                       | plays a role in actin cytoskeletal dynamics, and is necessary for formation of the corpus callosum |  | [S26]      |
| <i>miR-189</i>  | layers II-IV                                                                 | high broad neocortical expression at P9 becoming restricted to layers II-IV by P14 | binds to <i>Slitrk1</i> , whose overexpression increases dendrite length                           |  | [S27]      |
| <i>Nectin-3</i> | CPN in the middle sublamina of II/III                                        | high at P6, and decreased by P14                                                   | unknown                                                                                            |  | [S16]      |
| <i>Nnmt</i>     | CPN in the superficial sublamina of II/III                                   | high at P3 and P6, and decreased by P14                                            | unknown                                                                                            |  | [S16]      |
| <i>PlexinD1</i> | CPN in Va, and the superficial sublamina of II/III                           | high at P3, with expression maintained at P14                                      | unknown                                                                                            |  | [S16]      |
| <i>Ptn</i>      | CPN in deep sublamina of II/III                                              | high E18-P6, and decreased by P14                                                  | unknown                                                                                            |  | [S16]      |
| <i>Satb2</i>    | layers II-IV, V, and VI                                                      | early post-mitotic until early postnatal (decreased by P7)                         | represses <i>Ctip2</i> to regulate CPN identity and axonal midline crossing                        |  | [S28-S30]  |
| <i>Svet1</i>    | layers II-IV                                                                 | maintained from progenitors into adulthood (not observed after P60)                | unknown                                                                                            |  | [S9]       |
| <i>Tcrb</i>     | CPN in layers Vb and                                                         | increasing expression                                                              | unknown                                                                                            |  | [S16]      |

|              |                                      |                                                             |         |       |
|--------------|--------------------------------------|-------------------------------------------------------------|---------|-------|
|              | VI                                   | postnatally                                                 |         |       |
| <i>Unc5d</i> | cortical plate and layers II/III, IV | early post-mitotic until early postnatal (decreased by P14) | unknown | [S15] |

Abbreviations: VZ, ventricular zone; SVZ, subventricular zone; IPC, intermediate progenitor cell; E, embryonic day; P, postnatal day; S1, primary somatosensory cortex; roman numerals (I-VI) label neocortical layers.

### **Supplementary References**

- S1. Pinto, L., *et al.* (2009) AP2 $\gamma$  regulates basal progenitor fate in a region- and layer-specific manner in the developing cortex. *Nat Neurosci* 12, 1229-1237
- S2. McEvilly, R.J., *et al.* (2002) Transcriptional regulation of cortical neuron migration by POU domain factors. *Science* 295, 1528-1532
- S3. Sugitani, Y., *et al.* (2002) Brn-1 and Brn-2 share crucial roles in the production and positioning of mouse neocortical neurons. *Genes Dev* 16, 1760-1765
- S4. Nieto, M., *et al.* (2004) Expression of Cux-1 and Cux-2 in the subventricular zone and upper layers II-IV of the cerebral cortex. *J Comp Neurol* 479, 168-180
- S5. Cubelos, B., *et al.* (2007) Cux-2 Controls the Proliferation of Neuronal Intermediate Precursors of the Cortical Subventricular Zone. *Cerebral Cortex* 18, 1758-1770
- S6. Zimmer, C., *et al.* (2004) Dynamics of Cux2 expression suggests that an early pool of SVZ precursors is fated to become upper cortical layer neurons. *Cereb Cortex* 14, 1408-1420
- S7. Bulchand, S., *et al.* (2001) LIM-homeodomain gene Lhx2 regulates the formation of the cortical hem. *Mech Dev* 100, 165-175
- S8. Bulchand, S., *et al.* (2003) Dynamic spatiotemporal expression of LIM genes and cofactors in the embryonic and postnatal cerebral cortex. *Dev Dyn* 226, 460-469
- S9. Tarabykin, V., *et al.* (2001) Cortical upper layer neurons derive from the subventricular zone as indicated by Svet1 gene expression. *Development* 128, 1983-1993
- S10. Englund, C. (2005) Pax6, Tbr2, and Tbr1 Are Expressed Sequentially by Radial Glia, Intermediate Progenitor Cells, and Postmitotic Neurons in Developing Neocortex. *Journal of Neuroscience* 25, 247-251
- S11. Sessa, A., *et al.* (2008) Tbr2 directs conversion of radial glia into basal precursors and guides neuronal amplification by indirect neurogenesis in the developing neocortex. *Neuron* 60, 56-69
- S12. Chou, S.-J., *et al.* (2009) Lhx2 specifies regional fate in Emx1 lineage of telencephalic progenitors generating cerebral cortex. *Nat Neurosci*, 1-10
- S13. Land, P.W., and Monaghan, A.P. (2003) Expression of the transcription factor, *tailless*, is required for formation of superficial cortical layers. *Cereb Cortex* 13, 921-931

- S14. Roy, K., *et al.* (2004) The Tlx gene regulates the timing of neurogenesis in the cortex. *J Neurosci* 24, 8333-8345
- S15. Zhong, Y., *et al.* (2004) Identification of the genes that are expressed in the upper layers of the neocortex. *Cereb Cortex* 14, 1144-1152
- S16. Molyneaux, B.J., *et al.* (2009) Novel Subtype-specific Genes Identify Distinct Subpopulations of Callosal Projection Neurons. *J Neurosci* 29, 12343-12354
- S17. Cubelos, B., *et al.* Cux1 and Cux2 regulate dendritic branching, spine morphology, and synapses of the upper layer neurons of the cortex. *Neuron* 66, 523-535
- S18. Chenn, A., *et al.* (2001) Temporally and spatially regulated expression of a candidate G-protein-coupled receptor during cerebral cortical development. *J Neurobiol* 46, 167-177
- S19. Arlotta, P., *et al.* (2005) Neuronal subtype-specific genes that control corticospinal motor neuron development in vivo. *Neuron* 45, 207-221
- S20. Azim, E., *et al.* (2009) Lmo4 and Clim1 progressively delineate cortical projection neuron subtypes during development. *Cereb Cortex* 19 Suppl 1, i62-69
- S21. Kashani, A.H., *et al.* (2006) Calcium activation of the LMO4 transcription complex and its role in the patterning of thalamocortical connections. *J Neurosci* 26, 8398-8408
- S22. Huang, Z., *et al.* (2009) Transcription factor Lmo4 defines the shape of functional areas in developing cortices and regulates sensorimotor control. *Dev Biol* 327, 132-142
- S23. Takeuchi, A., and O'Leary, D.D. (2006) Radial migration of superficial layer cortical neurons controlled by novel Ig cell adhesion molecule MDGA1. *J Neurosci* 26, 4460-4464
- S24. Takeuchi, A., *et al.* (2007) Novel IgCAM, MDGA1, expressed in unique cortical area- and layer-specific patterns and transiently by distinct forebrain populations of Cajal-Retzius neurons. *Cereb Cortex* 17, 1531-1541
- S25. Li, H., *et al.* (2008) Transcription factor MEF2C influences neural stem/progenitor cell differentiation and maturation in vivo. *Proc Natl Acad Sci U S A* 105, 9397-9402
- S26. Lanier, L.M., *et al.* (1999) Mena is required for neurulation and commissure formation. *Neuron* 22, 313-325
- S27. Abelson, J.F., *et al.* (2005) Sequence variants in SLITRK1 are associated with Tourette's syndrome. *Science* 310, 317-320
- S28. Alcamo, E.A., *et al.* (2008) Satb2 regulates callosal projection neuron identity in the developing cerebral cortex. *Neuron* 57, 364-377
- S29. Britanova, O., *et al.* (2005) Novel transcription factor Satb2 interacts with matrix attachment region DNA elements in a tissue-specific manner and demonstrates cell-type-dependent expression in the developing mouse CNS. *Eur J Neurosci* 21, 658-668
- S30. Britanova, O., *et al.* (2008) Satb2 is a postmitotic determinant for upper-layer neuron specification in the neocortex. *Neuron* 57, 378-392
